# Supplementary material for: Single-Step BLUP with Varying Genotyping Effort in Open-Pollinated Picea glauca
Source: PubMed Central journal article supplement (PMC5345723; doi:10.1534/g3.116.037895), 2017-01-24

**Fig. S2.** Comparison of nucleotide substitution probabilities for 5% of top matrices that maximized the values of  $F_{\pi}$  (the normalized difference between the relative frequency of four-fold degenerated codons after the selection on amino acids and their expected frequency resulting only from a mutation process). The thick line indicates median, the grey box shows quartile range and the whiskers determine the range without outliers.

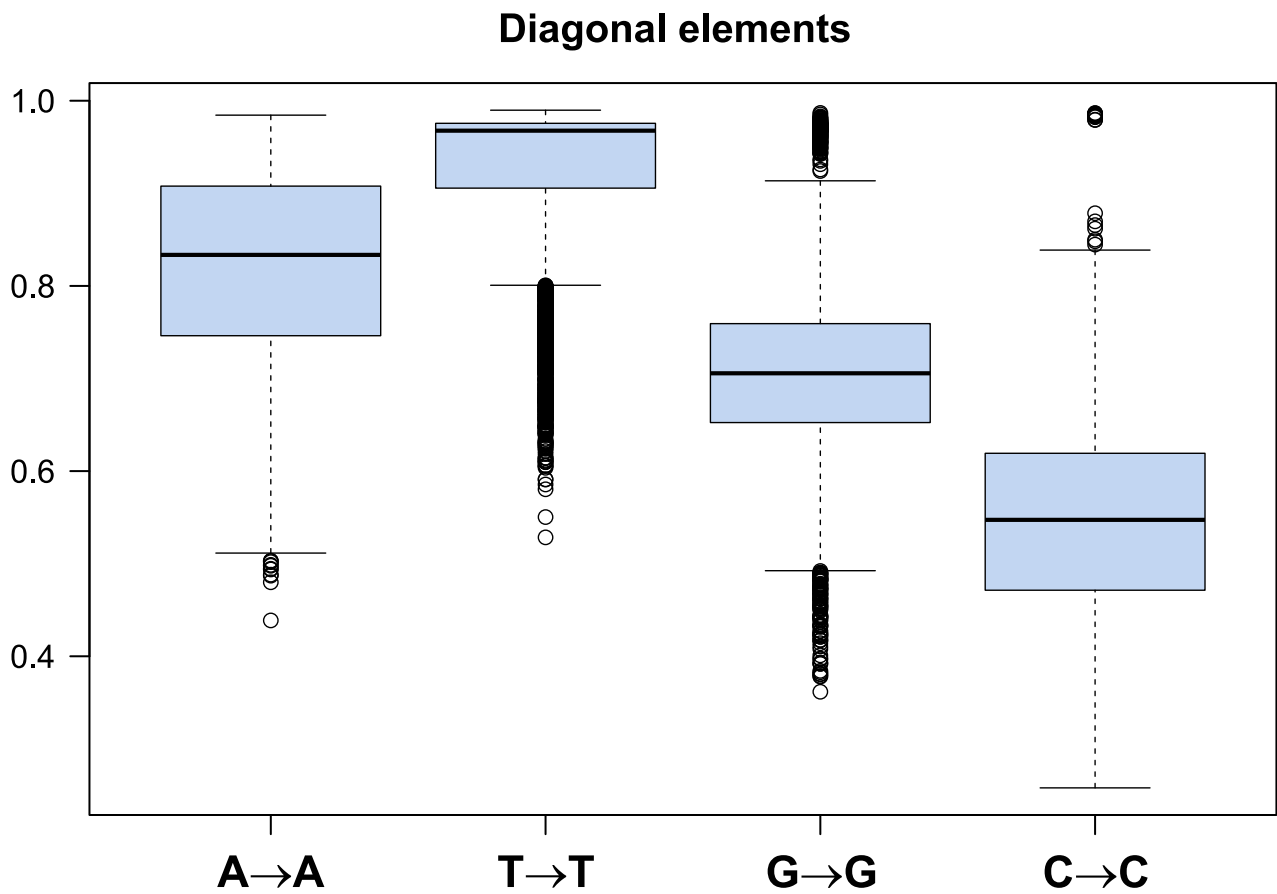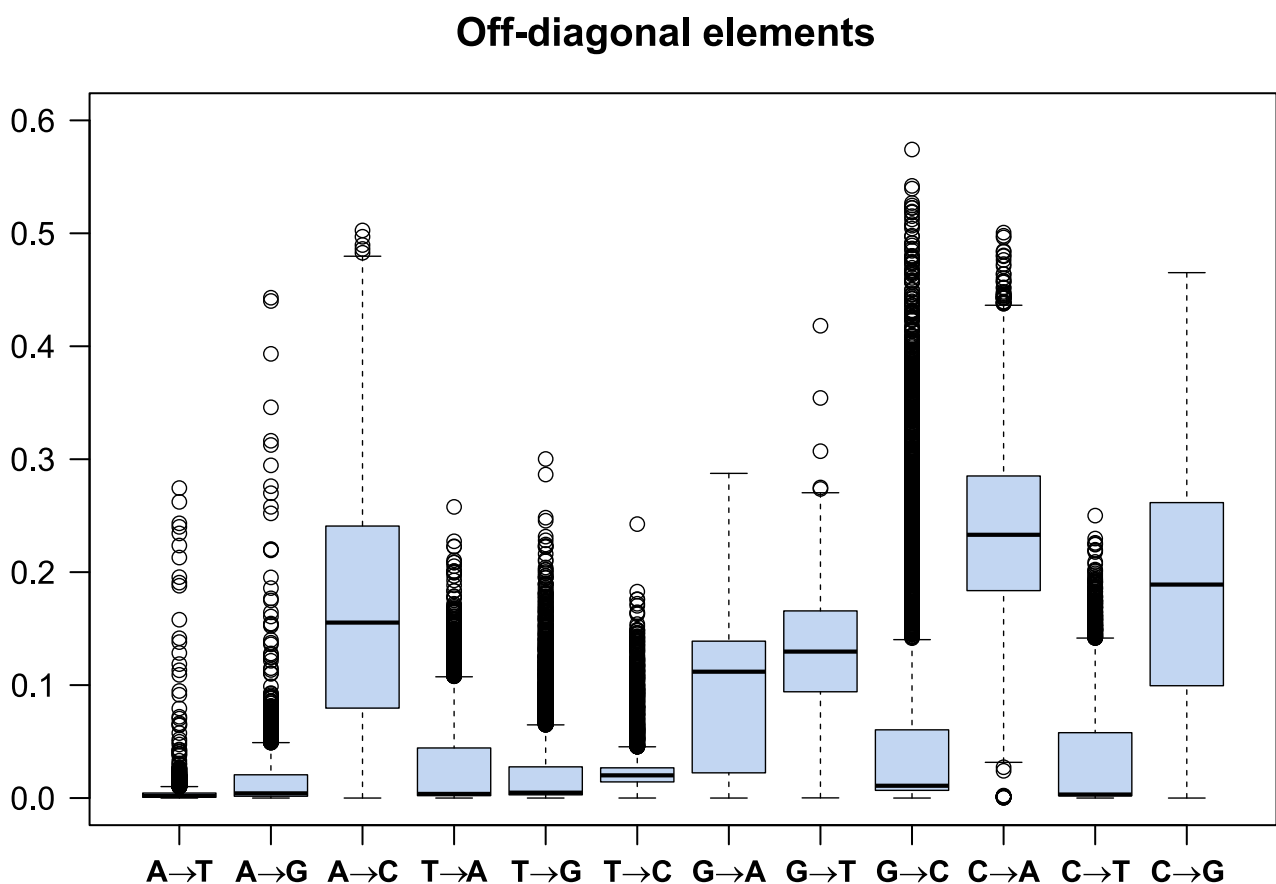

Supplement: 935FigureS2.pdf [file 935FigureS2.pdf]
